# Supplementary material for: Integrated bioinformatics and statistical approaches to explore molecular biomarkers for breast cancer diagnosis, prognosis and therapies
Source: PubMed Central journal article supplement (PMC9135200; doi:10.1371/journal.pone.0268967), 2022-05-26
Supplement: pone.0268967.s002.pdf [file pone.0268967.s002.pdf]

## File S2: Supplementary results

**Table S1:** List of up and down regulated DEGs and key genes (KGs) marked by bold. adj.P.Value < 0.01 and |logFC| > 1.0 threshold have been considered to extracted the differential expressed genes.

| Up regulated DEGs                                                                                                                                                                                                                                                                                                                                                                                                        | Down regulated DEGs                                                                                                                                                                                                                                                                                                                                                                                                                                                                                                                                                                                                                                                                                                                                                                                                                                                                                                                                                                                                                                                                                                |
|--------------------------------------------------------------------------------------------------------------------------------------------------------------------------------------------------------------------------------------------------------------------------------------------------------------------------------------------------------------------------------------------------------------------------|--------------------------------------------------------------------------------------------------------------------------------------------------------------------------------------------------------------------------------------------------------------------------------------------------------------------------------------------------------------------------------------------------------------------------------------------------------------------------------------------------------------------------------------------------------------------------------------------------------------------------------------------------------------------------------------------------------------------------------------------------------------------------------------------------------------------------------------------------------------------------------------------------------------------------------------------------------------------------------------------------------------------------------------------------------------------------------------------------------------------|
| <i>MATN3, PIGZ, PDE4DIP, SLCO2A1, SGK1, CLN8, ABLIM2, SEMA3C, YPEL4, C8orf58, SEMA3A, FBXO15, NR2F1, CASP4, KDM7A, HIC2, POLR3E, CCDC74B, C12orf76, CFAP206, CASP5, CDADC1, RELB, C5orf45, OSR2, FBXO16, MESP1, TMEM222, CLDN1, CDK6, TBX6, PCDH9, MYO15B, TCTN1, ZC3H10, GLIPR1L2, BCL11A, CREB5, NOC2L, RGPDI, CYB5R1, CECR5-AS1, NT5E, CITED4, C14orf37, EVL, LYRM9, LINC01016, JHDM1D-AS1, ANGPT1, LOC101929147.</i> | <i>MARCO, CDCA5, HRASLS2, CTSO, AQP3, FMOD, SORCS2, TRAPPC13, FAM105A, NEURL1, AKRIC3, RFC3, SLIT2, GSE1, HSH2D, TLE2, ANKRD1, CDCA3, CAPG, RASSF2, <b>TP53INP1</b>, CSTA, MPP1, RARRES3, AQP1, TSPAN2, IFI6, CALHM2, LPAR5, GJB2, <b>NQO1</b>, EPB41L5, GINS1, EGR1, KIAA0408, PLS3, HOPX, APOL3, PLXNA2, PCDH7, C4BPB, ST6GALNAC5, ZNF385B, SPEG, NUP62CL, PLCH1, DTX3L, IFIT3, AHRR, SESN3, GIMAP2, MELTF, KDELC2, BST2, TIMP3, CDH24, PRUNE2, HPN, METTL7A, JADE2, CARD6, EP400, TDRD10, PODNLI, IFI44L, CCNA1, DHRS2, FAXDC2, DGKH, FOLR1, NEMPI, SPRED1, LDHD, STAT1, <b>OAS1</b>, RACGAP1P, <b>IRF9</b>, HES1, PARP9, IFITM1, CITED1, SLC6A12, B3GNT3, NOSTRIN, TDO2, PLAT, TAGLN, FOXN3, CA2, PSMD9, <b>FNI</b>, SAMD9, COCH, EPB41LI, TRIM14, PML, <b>AKRIC1</b>, BHLHE40, IFI27, TRIP13, PLEKHS1, CENPJ, RNF39, RSAD2, PDE4A, GLS2, DDX60, <b>OAS3</b>, OAS2, REC8, TPP1, PMEPA1, ADCY7, CEP128, UNC13A, SECTM1, GLDN, LINC00933, SLC20A2, TRANK1, <b>HPGD</b>, ACTR3C, <b>ATF6B</b>, CENPN, COQ2, RAB3B, LINC01224, KNDC1, LNX2, PABPC4L, SLC16A7, C2, FAM101A, DNAH2, MBD3, SHISA2, TDRD12, ZMAT1.</i> |
| Bold indicates key genes (KGs).                                                                                                                                                                                                                                                                                                                                                                                          |                                                                                                                                                                                                                                                                                                                                                                                                                                                                                                                                                                                                                                                                                                                                                                                                                                                                                                                                                                                                                                                                                                                    |

**Table S2:** list of 13 identified key genes (kg) with gene name, logFC, p-value, and adjusted p-value.

| Gene.symbol | Gene name                                                  | logFC     | P.Value  | adj.P.Val |
|-------------|------------------------------------------------------------|-----------|----------|-----------|
| AKRIC1      | aldo-keto reductase family 1 member C1                     | -2.908633 | 4.16E-10 | 4.28E-06  |
| FNI         | fibronectin 1                                              | -2.480665 | 1.71E-06 | 0.001001  |
| OAS3        | 2'-5'-oligoadenylate synthetase 3                          | -2.355372 | 1.62E-08 | 4.75E-05  |
| IRF9        | interferon regulatory factor 9                             | -2.331889 | 8.43E-09 | 3.15E-05  |
| HPGD        | hydroxyprostaglandin dehydrogenase 15-(NAD)                | -1.956437 | 2.15E-09 | 1.36E-05  |
| OAS1        | 2'-5'-oligoadenylate synthetase 1                          | -1.76677  | 7.49E-05 | 0.007712  |
| SLCO2A1     | solute carrier organic anion transporter family member 2A1 | 1.72759   | 5.94E-05 | 0.006722  |
| ATF6B       | activating transcription factor 6 beta                     | -1.68305  | 0.000115 | 0.009925  |
| NT5E        | 5'-nucleotidase ecto                                       | 1.670646  | 8.56E-06 | 0.002494  |
| BCL11A      | B-cell CLL/Lymphoma 11A                                    | 1.636371  | 1.30E-05 | 0.003059  |
| NQO1        | NAD(P)H quinone dehydrogenase 1                            | -1.577233 | 5.89E-05 | 0.006702  |
| ANGPT1      | angiopoietin 1                                             | 1.55281   | 2.12E-07 | 0.000277  |
| TP53INP1    | tumor protein p53 inducible nuclear protein 1              | -1.517725 | 6.24E-07 | 0.000562  |

**S3 Table** Gene Ontology (GO) and Kyoto Encyclopedia of Genes and Genomes (KEGG) analysis of the differentially expressed genes (DEGs).

| Terms/Functions                                                                                              | Count | PValue   | Genes                                                                                |
|--------------------------------------------------------------------------------------------------------------|-------|----------|--------------------------------------------------------------------------------------|
| <b>GO functional analysis</b>                                                                                |       |          |                                                                                      |
| <b>Down regulated DEGs</b>                                                                                   |       |          |                                                                                      |
| <b>GO Terms of Biological Process (BP)</b>                                                                   |       |          |                                                                                      |
| GO:0060337~type I interferon signaling pathway                                                               | 12    | 8.41E-13 | <i>BST2, EGR1, IFITM1, IFI27, RSAD2, OAS1, STAT1, OAS2, OAS3, IFI6, IRF9, IFIT3</i>  |
| GO:0051607~defense response to virus                                                                         | 12    | 2.72E-08 | <i>BST2, IFITM1, RSAD2, OAS1, STAT1, OAS2, OAS3, DDX60, IFI44L, IRF9, PML, IFIT3</i> |
| GO:0009615~response to virus                                                                                 | 8     | 1.38E-05 | <i>BST2, IFITM1, RSAD2, OAS1, OAS2, OAS3, DDX60, IFIT3</i>                           |
| GO:0060333~interferon-gamma-mediated signaling pathway                                                       | 6     | 1.53E-04 | <i>OAS1, STAT1, OAS2, OAS3, IRF9, PML, ATF6B</i>                                     |
| GO:0045071~negative regulation of viral genome replication                                                   | 5     | 1.86E-04 | <i>BST2, IFITM1, RSAD2, OAS1, OAS3</i>                                               |
| GO:0006302~double-strand break repair                                                                        | 5     | 0.00127  | <i>DTX3L, CDCA5, TRIP13, PARP9, REC8</i>                                             |
| GO:0035456~response to interferon-beta                                                                       | 3     | 0.00176  | <i>BST2, IFITM1, STAT1</i>                                                           |
| GO:0034097~response to cytokine                                                                              | 4     | 0.0061   | <i>CITED1, IFI27, STAT1, PML</i>                                                     |
| GO:0007141~male meiosis I                                                                                    | 3     | 0.00719  | <i>CCNA1, TRIP13, REC8</i>                                                           |
| GO:0034341~response to interferon-gamma                                                                      | 3     | 0.01261  | <i>BST2, IFITM1, CITED1</i>                                                          |
| GO:0060700~regulation of ribonuclease activity                                                               | 2     | 0.01424  | <i>OAS1, OAS3</i>                                                                    |
| GO:0007584~response to nutrient                                                                              | 4     | 0.01597  | <i>NQO1, STAT1, AKR1C3, C2</i>                                                       |
| GO:0003340~negative regulation of mesenchymal to epithelial transition involved in metanephros morphogenesis | 2     | 0.02129  | <i>CITED1, STAT1</i>                                                                 |
| GO:0003091~renal water homeostasis                                                                           | 3     | 0.02184  | <i>ADCY7, AQP3, AQP1</i>                                                             |
| GO:0008285~negative regulation of cell proliferation                                                         | 8     | 0.02361  | <i>IFITM1, RARRES3, TP53INP1, NEURL1, SPEG, DHRS2, PML, IFIT3</i>                    |
| GO:0032355~response to estradiol                                                                             | 4     | 0.02744  | <i>MBD3, NQO1, GJB2, IFI27</i>                                                       |
| GO:0015670~carbon dioxide transport                                                                          | 2     | 0.02828  | <i>CA2, AQP1</i>                                                                     |
| GO:0071395~cellular response to jasmonic acid stimulus                                                       | 2     | 0.02828  | <i>AKR1C1, AKR1C3</i>                                                                |
| GO:0046683~response to organophosphorus                                                                      | 2     | 0.02828  | <i>RFC3, AKR1C1</i>                                                                  |
| GO:0030336~negative regulation of cell migration                                                             | 4     | 0.03063  | <i>BST2, IFITM1, TP53INP1, SLIT2</i>                                                 |
| GO:0051902~negative regulation of mitochondrial depolarization                                               | 2     | 0.03523  | <i>HSH2D, IFI6</i>                                                                   |
| GO:0071504~cellular response to heparin                                                                      | 2     | 0.03523  | <i>EGR1, SLIT2</i>                                                                   |
| GO:0010756~positive regulation of plasminogen activation                                                     | 2     | 0.03523  | <i>HPN, MELTF</i>                                                                    |
| GO:0061626~pharyngeal arch artery morphogenesis                                                              | 2     | 0.04897  | <i>HES1, FOLR1</i>                                                                   |
| GO:0044598~doxorubicin metabolic process                                                                     | 2     | 0.05577  | <i>AKR1C1, AKR1C3</i>                                                                |

|                                                                                                  |   |         |                                                                     |
|--------------------------------------------------------------------------------------------------|---|---------|---------------------------------------------------------------------|
| GO:0044597~daunorubicin metabolic process                                                        | 2 | 0.05577 | <i>AKR1C1, AKR1C3</i>                                               |
| GO:0048146~positive regulation of fibroblast proliferation                                       | 3 | 0.05697 | <i>FNI, PML, AQP1</i>                                               |
| GO:1901796~regulation of signal transduction by p53 class mediator                               | 4 | 0.05928 | <i>MBD3, RFC3, TP53INP1, PML</i>                                    |
| GO:0055114~oxidation-reduction process                                                           | 9 | 0.06191 | <i>NQO1, HPGD, SESN3, TDO2, FAXDC2, AKR1C1, LDHD, AKR1C3, DHRS2</i> |
| GO:0042448~progesterone metabolic process                                                        | 2 | 0.06252 | <i>AKR1C1, AKR1C3</i>                                               |
| GO:0035457~cellular response to interferon-alpha                                                 | 2 | 0.06252 | <i>OAS1, IFIT3</i>                                                  |
| GO:0042981~regulation of apoptotic process                                                       | 5 | 0.06656 | <i>EGR1, STAT1, GLS2, TP53INP1, CARD6</i>                           |
| GO:0035455~response to interferon-alpha                                                          | 2 | 0.06923 | <i>BST2, IFITM1</i>                                                 |
| GO:0035385~Roundabout signaling pathway                                                          | 2 | 0.08249 | <i>SLIT2, FMOD</i>                                                  |
| GO:0042574~retinal metabolic process                                                             | 2 | 0.08249 | <i>AKR1C1, AKR1C3</i>                                               |
| GO:0048846~axon extension involved in axon guidance                                              | 2 | 0.08249 | <i>SLIT2, FMOD</i>                                                  |
| GO:0043517~positive regulation of DNA damage response, signal transduction by p53 class mediator | 2 | 0.08249 | <i>SPRED1, ANKRD1</i>                                               |
| GO:0006164~purine nucleotide biosynthetic process                                                | 2 | 0.08249 | <i>OAS1, OAS2</i>                                                   |
| GO:0032868~response to insulin                                                                   | 3 | 0.08297 | <i>EGR1, CITED1, SESN3</i>                                          |
| GO:0045087~innate immune response                                                                | 7 | 0.08806 | <i>BST2, MARCO, TRIM14, C4BPB, DDX60, PML, C2</i>                   |
| GO:0006693~prostaglandin metabolic process                                                       | 2 | 0.08905 | <i>HPGD, AKR1C3</i>                                                 |
| GO:0009992~cellular water homeostasis                                                            | 2 | 0.08905 | <i>AQP3, AQP1</i>                                                   |
| GO:0015793~glycerol transport                                                                    | 2 | 0.08905 | <i>AQP3, AQP1</i>                                                   |
| GO:0030855~epithelial cell differentiation                                                       | 3 | 0.08941 | <i>TAGLN, AKR1C1, TPP1</i>                                          |
| GO:0071361~cellular response to ethanol                                                          | 2 | 0.09557 | <i>TP53INP1, ADCY7</i>                                              |
| GO:0007064~mitotic sister chromatid cohesion                                                     | 2 | 0.09557 | <i>CDCA5, REC8</i>                                                  |

---

**GO Terms of Cellular Component (CC)**

---

|                                               |    |          |                                                                                                                                                                                                                                                                                                                                                                                                                     |
|-----------------------------------------------|----|----------|---------------------------------------------------------------------------------------------------------------------------------------------------------------------------------------------------------------------------------------------------------------------------------------------------------------------------------------------------------------------------------------------------------------------|
| GO:0005737~cytoplasm                          | 57 | 4.91E-05 | <i>RAB3B, CITED1, GIMAP2, PLAT, AQP3, IFI44L, IFIT3, AQP1, CEP128, PSMD9, SPRED1, PODNLI, RASSF2, SESN3, CA2, ANKRD1, PLS3, UNC13A, DTX3L, HRASLS2, PARP9, OAS1, OAS2, OAS3, AHRR, TRIM14, IRF9, DGKH, CSTA, TAGLN, DNAH2, SAMD9, HPGD, CDCA5, PRUNE2, CAPG, DDX60, EPB41L5, EPB41L1, TP53INP1, RNF39, HES1, SLIT2, METTL7A, APOL3, GINS1, MBD3, EGR1, NQO1, STAT1, AKR1C3, DHRS2, HOPX, PML, BST2, GJB2, PLCH1</i> |
| GO:0005578~proteinaceous extracellular matrix | 7  | 0.009721 | <i>PODNLI, FNI, TIMP3, SLIT2, FMOD, GLDN, COCH</i>                                                                                                                                                                                                                                                                                                                                                                  |
| GO:0005911~cell-cell junction                 | 5  | 0.029262 | <i>CDCA3, EPB41L1, HPN, CDH24,</i>                                                                                                                                                                                                                                                                                                                                                                                  |

---

|                                                                                                |    |          |                                                                                                                                                                                                                                                                                                                                                                                                                                                                                                                                      |
|------------------------------------------------------------------------------------------------|----|----------|--------------------------------------------------------------------------------------------------------------------------------------------------------------------------------------------------------------------------------------------------------------------------------------------------------------------------------------------------------------------------------------------------------------------------------------------------------------------------------------------------------------------------------------|
|                                                                                                |    |          | <i>AQP3</i>                                                                                                                                                                                                                                                                                                                                                                                                                                                                                                                          |
| GO:0016323~basolateral plasma membrane                                                         | 5  | 0.033759 | <b>HPGD</b> , CA2, <i>AQP3</i> , <i>FOLR1</i> , <i>AQP1</i><br><i>CSTA</i> , <i>TLE2</i> , <b>FNI</b> , <i>SECTM1</i> , <i>PLAT</i> ,<br><i>C4BPB</i> , <i>GLDN</i> , <i>C2</i> , <i>CTSO</i> , <i>CA2</i> ,<br><b>OAS3</b> , <i>TIMP3</i> , <i>SLIT2</i> , <i>MELTF</i> ,<br><i>FMOD</i>                                                                                                                                                                                                                                            |
| GO:0005615~extracellular space                                                                 | 16 | 0.037725 | <i>CSTA</i> , <b>FNI</b> , <i>TIMP3</i> , <i>PLAT</i> , <i>FMOD</i> ,<br><i>COCH</i>                                                                                                                                                                                                                                                                                                                                                                                                                                                 |
| GO:0031012~extracellular matrix                                                                | 6  | 0.050375 | <i>MPP1</i> , <i>SLC20A2</i> , <i>PCDH7</i> , <i>HPN</i> ,<br><i>SLC6A12</i> , <i>AQP3</i> , <i>AQP1</i> , <i>BST2</i> ,<br><i>MARCO</i> , <i>CALHM2</i> , <i>PLXNA2</i> ,<br><i>B3GNT3</i> , <i>SLC16A7</i> , <i>TSPAN2</i> ,<br><i>MELTF</i> , <i>FOLR1</i>                                                                                                                                                                                                                                                                        |
| GO:0005887~integral component of plasma membrane                                               | 16 | 0.053921 | <i>RAB3B</i> , <i>CSTA</i> , <i>SLC20A2</i> , <b>HPGD</b> ,<br><i>HPN</i> , <i>SECTM1</i> , <i>PLAT</i> , <i>CAPG</i> ,<br><i>JADE2</i> , <i>COCH</i> , <i>C2</i> , <i>AQP1</i> , <i>ACTR3C</i> ,<br><i>CA2</i> , <i>TIMP3</i> , <i>SLIT2</i> , <i>METTL7A</i> ,<br><b>NQO1</b> , <b>AKRIC1</b> , <i>AKRIC3</i> , <b>FNI</b> ,<br><i>DHRS2</i> , <i>BST2</i> , <i>TPPI</i> , <i>MELTF</i> ,<br><i>FOLR1</i>                                                                                                                          |
| GO:0070062~extracellular exosome                                                               | 27 | 0.05531  | <i>RSAD2</i> , <i>GIMAP2</i> , <i>METTL7A</i><br><i>RAB3B</i> , <i>CDCA3</i> , <i>CITED1</i> , <b>HPGD</b> ,<br><i>CDCA5</i> , <i>IFIT3</i> , <i>PSMD9</i> , <i>SPRED1</i> ,<br><i>TDO2</i> , <i>EPB41L1</i> , <i>CA2</i> , <b>TP53INP1</b> ,<br><i>ANKRD1</i> , <i>PDE4A</i> , <b>NQO1</b> , <i>DTX3L</i> ,<br><i>STAT1</i> , <b>AKRIC1</b> , <i>AKRIC3</i> , <i>PARP9</i> ,<br><i>PML</i> , <i>CCNA1</i> , <i>HSH2D</i> , <b>OAS1</b> , <i>OAS2</i> ,<br><b>OAS3</b> , <i>CENPJ</i> , <i>CENPN</i> , <i>PLCH1</i> ,<br><b>IRF9</b> |
| GO:0005811~lipid particle                                                                      | 3  | 0.07331  | <i>CA2</i> , <i>PLAT</i> , <i>AQP1</i>                                                                                                                                                                                                                                                                                                                                                                                                                                                                                               |
| GO:0005829~cytosol                                                                             | 30 | 0.07858  |                                                                                                                                                                                                                                                                                                                                                                                                                                                                                                                                      |
| GO:0045177~apical part of cell                                                                 | 3  | 0.091261 |                                                                                                                                                                                                                                                                                                                                                                                                                                                                                                                                      |
| <b>GO Terms of Molecular Function (MF)</b>                                                     |    |          |                                                                                                                                                                                                                                                                                                                                                                                                                                                                                                                                      |
| GO:0001730~2'-5'-oligoadenylate synthetase activity                                            | 3  | 3.28E-04 | <b>OAS1</b> , <i>OAS2</i> , <b>OAS3</b>                                                                                                                                                                                                                                                                                                                                                                                                                                                                                              |
| GO:0003725~double-stranded RNA binding                                                         | 4  | 0.010666 | <b>OAS1</b> , <i>OAS2</i> , <b>OAS3</b> , <i>DDX60</i>                                                                                                                                                                                                                                                                                                                                                                                                                                                                               |
| GO:0016779~nucleotidyltransferase activity                                                     | 3  | 0.017174 | <b>OAS1</b> , <i>OAS2</i> , <b>OAS3</b>                                                                                                                                                                                                                                                                                                                                                                                                                                                                                              |
| GO:0004871~signal transducer activity                                                          | 6  | 0.01849  | <i>BST2</i> , <i>UNC13A</i> , <i>STAT1</i> , <i>SECTM1</i> ,<br><i>PLCH1</i> , <i>APOL3</i>                                                                                                                                                                                                                                                                                                                                                                                                                                          |
| GO:0047086~ketosteroid monooxygenase activity                                                  | 2  | 0.022227 | <b>AKRIC1</b> , <i>AKRIC3</i>                                                                                                                                                                                                                                                                                                                                                                                                                                                                                                        |
| GO:0047718~indanol dehydrogenase activity                                                      | 2  | 0.022227 | <b>AKRIC1</b> , <i>AKRIC3</i>                                                                                                                                                                                                                                                                                                                                                                                                                                                                                                        |
| GO:0018636~phenanthrene 9,10-monooxygenase activity                                            | 2  | 0.029526 | <b>AKRIC1</b> , <i>AKRIC3</i>                                                                                                                                                                                                                                                                                                                                                                                                                                                                                                        |
| GO:0047115~trans-1,2-dihydrobenzene-1,2-diol dehydrogenase activity                            | 2  | 0.029526 | <b>AKRIC1</b> , <i>AKRIC3</i>                                                                                                                                                                                                                                                                                                                                                                                                                                                                                                        |
| GO:0004032~alditol:NADP+ 1-oxidoreductase activity                                             | 2  | 0.051101 | <b>AKRIC1</b> , <i>AKRIC3</i>                                                                                                                                                                                                                                                                                                                                                                                                                                                                                                        |
| GO:0016655~oxidoreductase activity, acting on NAD(P)H, quinone or similar compound as acceptor | 2  | 0.058187 | <b>AKRIC1</b> , <i>AKRIC3</i>                                                                                                                                                                                                                                                                                                                                                                                                                                                                                                        |
| GO:0016491~oxidoreductase activity                                                             | 5  | 0.062918 | <b>HPGD</b> , <i>SESN3</i> , <b>AKRIC1</b> , <i>AKRIC3</i> ,<br><i>DHRS2</i>                                                                                                                                                                                                                                                                                                                                                                                                                                                         |
| GO:0048495~Roundabout binding                                                                  | 2  | 0.06522  | <i>SLIT2</i> , <i>FMOD</i>                                                                                                                                                                                                                                                                                                                                                                                                                                                                                                           |
| GO:0001191~transcriptional repressor                                                           | 2  | 0.086008 | <i>BHLHE40</i> , <i>AHRR</i>                                                                                                                                                                                                                                                                                                                                                                                                                                                                                                         |

|                                                                                           |    |          |                                                                                            |
|-------------------------------------------------------------------------------------------|----|----------|--------------------------------------------------------------------------------------------|
| activity, RNA polymerase II transcription factor binding                                  |    |          |                                                                                            |
| GO:0015254~glycerol channel activity                                                      | 2  | 0.086008 | <i>AQP3, AQP1</i>                                                                          |
| <b>Up regulated DEGs</b>                                                                  |    |          |                                                                                            |
| <b>GO Terms of BP</b>                                                                     |    |          |                                                                                            |
| GO:0010977~negative regulation of neuron projection development                           | 4  | 1.04E-04 | <i>BCL11A, SEMA3A, NR2F1, TBX6</i>                                                         |
| GO:0060666~dichotomous subdivision of terminal units involved in salivary gland branching | 2  | 0.01038  | <i>SEMA3C, SEMA3A</i>                                                                      |
| GO:0045944~positive regulation of transcription from RNA polymerase II promoter           | 7  | 0.014821 | <i>OSR2, MESP1, BCL11A, CITED4, NR2F1, TBX6, RELB, SLCO2A1</i>                             |
| GO:0000122~negative regulation of transcription from RNA polymerase II promoter           | 6  | 0.015973 | <i>OSR2, BCL11A, NR2F1, TBX6, NOC2L, RELB, NT5E</i>                                        |
| GO:0006351~transcription, DNA-templated                                                   | 10 | 0.016336 | <i>HIC2, ABLIM2, BCL11A, POLR3E, CITED4, NR2F1, TBX6, NOC2L, NT5E, KDM7A, RELB, ANGPT1</i> |
| GO:0006915~apoptotic process                                                              | 5  | 0.029434 | <i>CASP5, SEMA3A, CASP4, NOC2L, SGK1, ANGPT1,</i>                                          |
| GO:0010633~negative regulation of epithelial cell migration                               | 2  | 0.030825 | <i>SEMA3A, EVL</i>                                                                         |
| GO:0023019~signal transduction involved in regulation of gene expression                  | 2  | 0.038888 | <i>MESP1, TBX6</i>                                                                         |
| GO:0007411~axon guidance                                                                  | 3  | 0.043237 | <i>SEMA3C, SEMA3A, EVL</i>                                                                 |
| GO:0048843~negative regulation of axon extension involved in axon guidance                | 2  | 0.052842 | <i>SEMA3C, SEMA3A</i>                                                                      |
| GO:0071526~semaphorin-plexin signaling pathway                                            | 2  | 0.066599 | <i>SEMA3C, SEMA3A</i>                                                                      |
| GO:0050919~negative chemotaxis                                                            | 2  | 0.068548 | <i>SEMA3C, SEMA3A</i>                                                                      |
| GO:0042981~regulation of apoptotic process                                                | 3  | 0.072523 | <i>CASP5, CASP4, SGK1</i>                                                                  |
| GO:0001755~neural crest cell migration                                                    | 2  | 0.089732 | <i>SEMA3C, SEMA3A</i>                                                                      |
| GO:0045893~positive regulation of transcription, DNA-templated                            | 4  | 0.091214 | <i>OSR2, MESP1, KDM7A, CREB5</i>                                                           |
| <b>GO Terms of CC</b>                                                                     |    |          |                                                                                            |
| GO:0072557~IPAF inflammasome complex                                                      | 2  | 0.010928 | <i>CASP5, CASP4</i>                                                                        |
| GO:0097169~AIM2 inflammasome complex                                                      | 2  | 0.013099 | <i>CASP5, CASP4</i>                                                                        |
| GO:0072559~NLRP3 inflammasome complex                                                     | 2  | 0.017428 | <i>CASP5, FNI</i>                                                                          |
| <b>GO Terms of MF</b>                                                                     |    |          |                                                                                            |
| GO:0097153~cysteine-type endopeptidase activity involved in apoptotic process             | 2  | 0.02663  | <i>CASP5, FNI</i>                                                                          |
| GO:0038191~neuropilin binding                                                             | 2  | 0.030665 | <i>SEMA3C, SEMA3A</i>                                                                      |
| GO:0030215~semaphorin receptor binding                                                    | 2  | 0.046645 | <i>SEMA3C, SEMA3A</i>                                                                      |
| GO:0045499~chemorepellent activity                                                        | 2  | 0.054538 | <i>SEMA3C, SEMA3A</i>                                                                      |
| <b>KEGG enrichment analysis</b>                                                           |    |          |                                                                                            |
| <b>Down regulated DEGs</b>                                                                |    |          |                                                                                            |
| hsa05164:Influenza A                                                                      | 7  | 0.002058 | <i>RSAD2, OAS1, STAT1, OAS2, OAS3, PML, IRF9</i>                                           |
| hsa05168:Herpes simplex infection                                                         | 6  | 0.012895 | <i>OAS1, STAT1, OAS2, OAS3, PML,</i>                                                       |

|                                                              |   |          |                                                          |
|--------------------------------------------------------------|---|----------|----------------------------------------------------------|
|                                                              |   |          | <b><i>ATF6B, IRF9</i></b>                                |
| hsa04964:Proximal tubule bicarbonate reclamation             | 3 | 0.013288 | <i>CA2, GLS2, AQP1</i>                                   |
| hsa05162:Measles                                             | 5 | 0.018835 | <b><i>OAS1, STAT1, OAS2, OAS3, IRF9</i></b>              |
| hsa05160:Hepatitis C                                         | 5 | 0.018835 | <b><i>OAS1, STAT1, OAS2, OAS3, IRF9</i></b>              |
| hsa00130:Ubiquinone and other terpenoid-quinone biosynthesis | 2 | 0.081617 | <b><i>NQO1, COQ2</i></b>                                 |
| hsa04610:Complement and coagulation cascades                 | 3 | 0.098614 | <i>PLAT, C4BPB, C2</i>                                   |
| hsa04976:Bile secretion                                      | 3 | 0.098614 | <i>CA2, ADCY7, AQP1</i>                                  |
| <b>Up regulated DEGs</b>                                     |   |          |                                                          |
| hsa04360:Axon guidance                                       | 3 | 0.026619 | <i>ABLIM2, SEMA3C, SEMA3A</i>                            |
| hsa04151:PI3K-Akt signaling pathway                          | 4 | 0.030138 | <b><i>CDK6, ANGPT1, SGK1, SLCO2A1, CREB5, BCL11A</i></b> |

**\*Note:** Bold indicates key genes (KGs)
